# Supplementary material for: Fatty acid specific δ13C values reveal earliest Mediterranean cheese production 7,200 years ago
Source: PLoS One. 2018 Sep 5;13(9):e0202807. doi: 10.1371/journal.pone.0202807 (PMC6124750; doi:10.1371/journal.pone.0202807)
Supplement: S3 Table — (PDF) [file pone.0202807.s003.pdf]

S3 Table. Average composition of cattle, sheep, and goat milk and products based on data summarized in [76-79].

| Species                         | Dairy Product                       | Lactose (%) | Proteins (%) | Fat (%) | Reference                                         |
|---------------------------------|-------------------------------------|-------------|--------------|---------|---------------------------------------------------|
| Cattle<br>( <i>Bos taurus</i> ) | Milk                                | 5.42        | 3.15         | 3.25    | 59, 64                                            |
|                                 | Yogurt                              | 3.56        | 3.47         | 3.25    | 59, 64                                            |
|                                 | Soft cheese (e.g., cottage cheese)  | 0.6         | 11           | 4.3     | 59, 64                                            |
|                                 | Hard cheese (e.g., cheddar)         | 0.003       | 25           | 33      | 59, 64                                            |
| Sheep<br>( <i>Ovis aries</i> )  | Milk                                | 4.88        | 5.59         | 6.82    | 79                                                |
|                                 | Soft cheese (e.g. feta)             | 1.8         | 16.1         | 20.2    | 76                                                |
|                                 | Hard cheese (e.g., Pecorino)        | 0.2         | 25.8         | 32      | 76                                                |
| Goat<br>( <i>Capra hircus</i> ) | Milk                                | 4.52        | 3.56         | 4.51    | Averaged values of those presented in 79, Table 1 |
|                                 | Soft or whey cheese (e.g., ricotta) | 2.9         | 7            | 21      | 77, 79                                            |
|                                 | Hard cheese                         | 1.4         | 30           | 27      | 78, 79                                            |
